# Supplementary material for: Higher Dose Anticoagulation Cannot Prevent Disease Progression in COVID-19 Patients: A Systematic Review and Meta-Analysis
Source: MDPI journal article supplement (doi:10.3390/biomedicines10092194), 2022-09-05
Supplement: s1 [file s1]

**Figure S1: PRISMA 2020 flow diagram of the initial search**

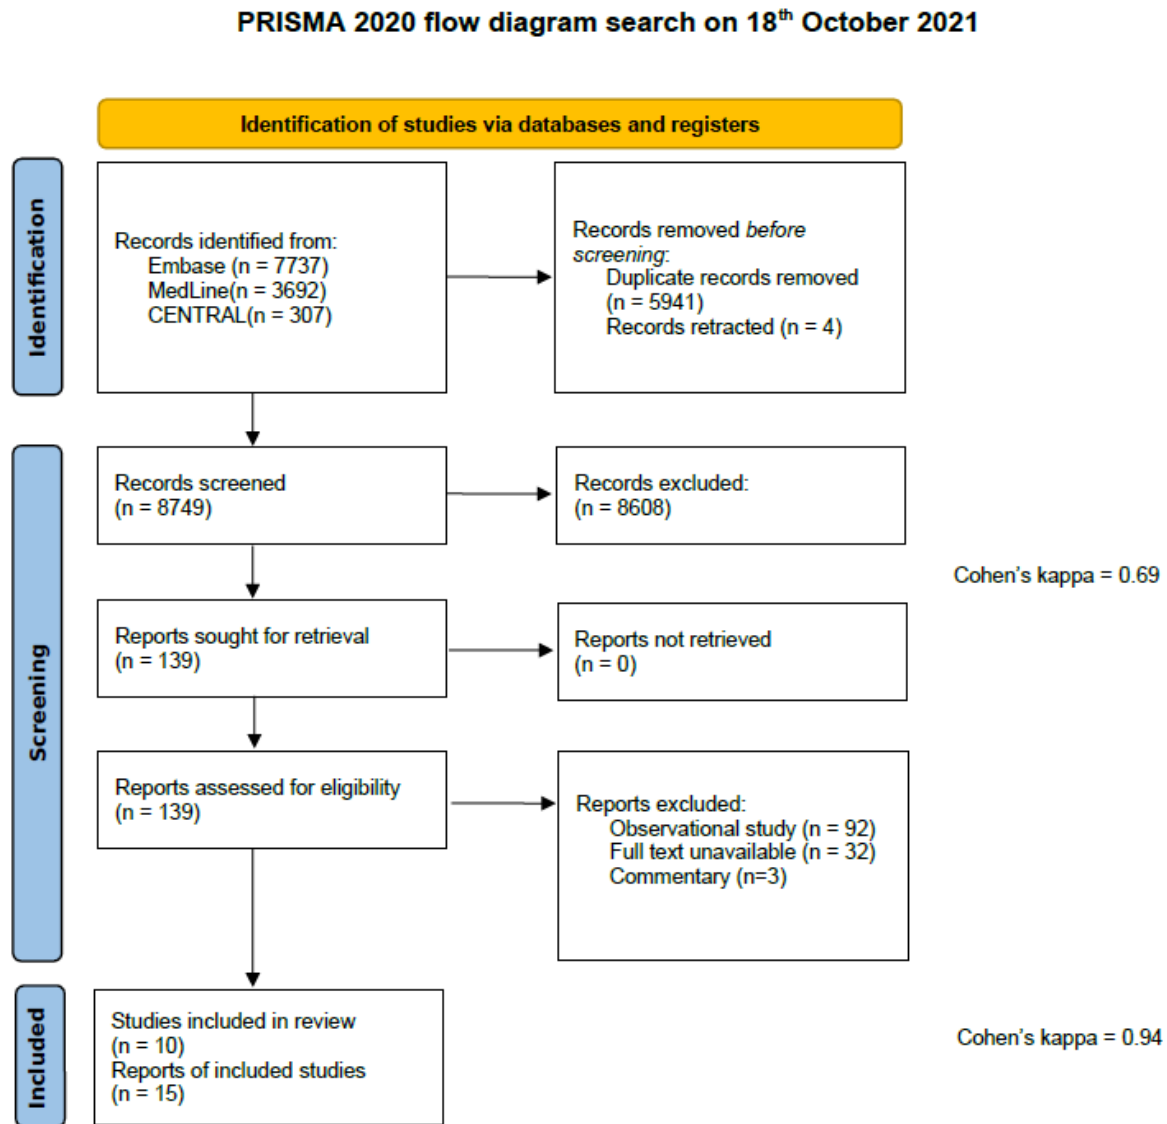

**Table S1.: Detailed inclusion and exclusion criteria of included trials with baseline D-dimer levels**

| Study             | Inclusion criteria                                                                                                                                                                                                                                                                                                                                                          | Exclusion criteria                                                                                                                                                                                                                                                                                                                                                                              | Median base-<br>line D-dimer<br>in ng/ml<br>(IQR)<br>SD/HD group | Mean age<br>(Standard Devia-<br>tion)<br>SD/HD group |
|-------------------|-----------------------------------------------------------------------------------------------------------------------------------------------------------------------------------------------------------------------------------------------------------------------------------------------------------------------------------------------------------------------------|-------------------------------------------------------------------------------------------------------------------------------------------------------------------------------------------------------------------------------------------------------------------------------------------------------------------------------------------------------------------------------------------------|------------------------------------------------------------------|------------------------------------------------------|
| HESACOVID<br>2020 | Adults with laboratory confirmed SARS-CoV-2 infection, presence of ARDS, severe clinical presentation with respiratory failure requiring mechanical ventilation, D-dimer levels greater than 1000 µg/L; pro-thrombin time/international normalized ratio (INR) < 1.5; activated partial thromboplastin time (aPTT)/ratio < 1.5, and platelet count greater than 100,000/mm3 | Creatinine clearance (CrCl) < 10 mL/min, severe circulatory shock with a dose of norepinephrine higher than 1.0 µg/kg/min, chronic renal failure in renal replacement therapy Child B and C chronic liver disease, advanced diseases, such as active cancer, heart failure with functional NYHA class III and IV, COPD using home oxygen, advanced dementia, significant disability from stroke | 3408 (1283-5532)<br>/<br>4176 (1986-6365)*                       | 55(16)<br>/<br>58(10)                                |

|                      |                                                                                                                                   |                                                                                                                                                                                                                                                                                                                                                                       |                                     |                             |
|----------------------|-----------------------------------------------------------------------------------------------------------------------------------|-----------------------------------------------------------------------------------------------------------------------------------------------------------------------------------------------------------------------------------------------------------------------------------------------------------------------------------------------------------------------|-------------------------------------|-----------------------------|
|                      |                                                                                                                                   | or severe head injury, cardiorespiratory arrest, pregnant women, recent major surgery or severe trauma in the last 3 weeks, recent stroke in the last 3 months<br>Active bleeding, blood dyscrasia such as hemophilia, Von Willebrand factor deficiency<br>Clinical indication for therapeutic anticoagulation due to pulmonary embolism, and acute coronary syndrome |                                     |                             |
| Goligher et al. 2021 | Adults hospitalised for COVID-19 with severe disease (requiring ICU)                                                              | Admission to the ICU with Covid-19 to a hospital for 72 hours or less before randomization<br>At imminent risk for death and there was no ongoing commitment to full organ support<br>High risk for bleeding, dual antiplatelet therapy, clinical indication for therapeutic dose anticoagulation, or history of heparin sensitivity.                                 | 890 (430-1740) / 823 (386.2-1844.2) | 61.7 (12.5) / 60.4 (13.1)   |
| Lawler et al. 2021   | Adults hospitalised for Covid-19 infection with moderate disease (without the need for ICU-level care)                            | Admission to the ICU with Covid-19 to a hospital for 72 hours or less before randomization<br>At imminent risk for death and there was no ongoing commitment to full organ support<br>High risk for bleeding, dual antiplatelet therapy, clinical indication for therapeutic dose anticoagulation, or history of heparin sensitivity.                                 | 750 (500-1350) / 800 (450-1250)     | 58.8 (13.9) / 59 (14.1)     |
| Perepu et al. 2021   | Adults hospitalised with diagnosis of COVID-19 admitted to an ICU and/or had a modified ISTH Overt DIC score $\geq 3$             | Clinical indication for therapeutic dose anticoagulation<br>Active major bleeding, severe thrombocytopenia (platelet count $< 25,000/\mu\text{L}$ ), within the prior 3 months,<br>Acute or chronic renal insufficiency with an estimated creatinine clearance $< 30 \text{ ml/min}$ .                                                                                | 950 (435-1990) / 785 (515-2025)     | 63.5 (30-85) / 65 (24-86)** |
| X-COVID 2021         | All patients aged $> 18$ years with COVID-19 infection.                                                                           | Directly admitted to ICU<br>Creatinine clearance $< 15 \text{ ml/min/1.73 m}^2$ ,<br>Clinical indication for therapeutic anticoagulant treatment for prior indications, were on treatment with heparin at higher doses than recommended for thromboprophylaxis, Active bleeding or at high bleeding risk                                                              | 320 (180-710) / 360 (190-680)       | 59 (48-72) / 60 (53-73)**   |
| COVID-HEP 2022       | Acute severe laboratory confirmed COVID-19 infection. (D-dimer $> 1000 \text{ ng/ml}$ in ward, or hospitalization in intermediate | Therapeutic anticoagulation for any indication other than COVID-19, contraindication to therapeutic anticoagulation, a high risk of bleeding, ongoing pregnancy, extreme body weight, and participation in another clinical trial.                                                                                                                                    | 1678 (1441) / 1706 (1540) ***       | 62.9 (12.2) / 62.1 (11.9)   |
| HEP-COVID 2020       | Hospitalized nonpregnant adults 18 years or older with diagnosed with COVID-19, with requirement for                              | Clinical indication for full-dose anticoagulation or dual antiplatelet therapy                                                                                                                                                                                                                                                                                        | 1700 (1072-2942) /                  | 67.7 (14.1) / 65.8 (13.9)   |

|                     |                                                                                                                                                                                                                                                                                                                                                     |                                                                                                                                                                                                                                                                                                                                                                                         |                                                                         |                                     |
|---------------------|-----------------------------------------------------------------------------------------------------------------------------------------------------------------------------------------------------------------------------------------------------------------------------------------------------------------------------------------------------|-----------------------------------------------------------------------------------------------------------------------------------------------------------------------------------------------------------------------------------------------------------------------------------------------------------------------------------------------------------------------------------------|-------------------------------------------------------------------------|-------------------------------------|
|                     | supplemental oxygen per investigator judgment and plasma D-dimer level greater than 4 times the upper limit of normal based on local laboratory criteria or a sepsis-induced coagulopathy score of 4 or greater                                                                                                                                     | Bleeding within the past month, active gastrointestinal or intracranial cancer<br>Bronchiectasis or pulmonary cavitation, hepatic dysfunction with baseline inter-national normalized ratio greater than 1.5,<br>Creatinine clearance (CrCl) less than 15 mL/min/1.73 m <sup>2</sup> ,<br>Platelet count less than 25 000/ $\mu$ L, a history of heparin-induced thrombocytopenia (HIT) | 1451 (1045-3393)                                                        |                                     |
| RAPID 2021          | Adults with laboratory confirmed SARS-CoV-2 infection and elevated D-dimer levels within the first 5 days of admission. D-dimer levels were required to be above the upper limit of normal (ULN) of the local hospital in the presence of an oxygen saturation $\leq$ 93% on room air, or $\geq$ 2 times the ULN irrespective of oxygen saturation. | Substantial bleeding risks,<br>Clinical indication for or any contraindication against heparin anticoagulation<br>If they had already met, or would imminently meet any component of the primary outcome.                                                                                                                                                                               | 1250 (450)<br>/<br>1050 (350)***                                        | 59.6 (15.5)<br>/<br>60.4 (14.1)     |
| ACTION 2021         | Adults hospitalised with a confirmed diagnosis of COVID-19, with symptoms for up to 14 days before randomisation, and elevated D-dimer concentration (above the upper limit of normal reference range per local laboratory).                                                                                                                        | Clinical indication for therapeutic anticoagulation<br>Contraindications to rivaroxaban or heparin,<br>High risk for bleeding.                                                                                                                                                                                                                                                          | 73% of patients had a value between 250-750 ng/mL, 27% more than 750 ng | 56.5 (14.5)<br>/<br>56.7 (14.1)     |
| Oliynyk et al. 2021 | Confirmed COVID-19 with bilateral interstitial pneumonia on CT scan, respiratory failure (PaO <sub>2</sub> <60mmHg), D-dimer > 3mg/L, platelet count <120x10 <sup>9</sup> /L                                                                                                                                                                        | Intubation prior to enrollment, contraindication to LMWH or UFH, active bleeding, CrCl<30 mL/min, unstable arterial hypertension, PE confirmed, pregnancy, breastfeeding,.                                                                                                                                                                                                              | 5246(3567-5657)<br>/<br>4494 (4221-5664)<br>/<br>5245 /(4221-5445)      | 71 (68-72) /<br>70.5 (68-72)**      |
| INSPIRATION 2021    | Adults admitted to the ICU with polymerase chain reaction testing-confirmed COVID-19 within 7 days of the index hospitalization                                                                                                                                                                                                                     | Life expectancy less than 24 hours<br>Clinical indication for therapeutic-dose anticoagulation<br>History of heparin-induced thrombocytopenia, platelet count less than 50 $\times$ 10 <sup>3</sup> / $\mu$ L,<br>Overt bleeding                                                                                                                                                        | 910 (410-2380)<br>/<br>1037 (460-3121)                                  | 61 (47-71)<br>/<br>62 (51-70.7)***  |
| Rashidi et al. 2021 | Adult patients with positive SARS-CoV-2 reverse transcription-polymerase chain reaction (RT-PCR) assay within 5 days of the index hospitalization without known diagnosis of thrombosis, who were admitted to the ICU with PaO <sub>2</sub> /FiO <sub>2</sub> (P/F) ratios <100 and D-dimer levels >3000 ng/mL were assessed for eligibility        | Hemodynamic instability, estimated life expectancy<24h, pregnancy or breastfeeding, Active bleeding and any contraindications for thrombolytic and anticoagulation therapy, allergy to study drug.                                                                                                                                                                                      | 15,000 (7293–15,000)<br>/<br>10,000 (6340.5–10,000)                     | 63 (48-65.5)<br>/<br>53 (43-67) *** |
| BEMICOP 2022        | Adult patients who required admission due to non-severe (CURB65 $\leq$ 2 points and baseline oxygen saturation $\geq$ 90%) COVID-19 pneumonia, with baseline D-dimer >500 ng/mL                                                                                                                                                                     | Clinical indication for full therapeutic-dose anticoagulation<br>Acute venous thromboembolism within prior 3 months                                                                                                                                                                                                                                                                     | 770 (590-1030)<br>/<br>780 (600-1125)                                   | 62.3 (12.2)<br>/<br>63 (13.7)       |

|                     |                                                                                                                                                                                                                                                                                                                                               |                                                                                                                                                                                                                                                                                            |                                                           |                                   |
|---------------------|-----------------------------------------------------------------------------------------------------------------------------------------------------------------------------------------------------------------------------------------------------------------------------------------------------------------------------------------------|--------------------------------------------------------------------------------------------------------------------------------------------------------------------------------------------------------------------------------------------------------------------------------------------|-----------------------------------------------------------|-----------------------------------|
|                     |                                                                                                                                                                                                                                                                                                                                               | Acute cardiovascular event within prior 3 months, acute stroke within prior 3 months                                                                                                                                                                                                       |                                                           |                                   |
|                     |                                                                                                                                                                                                                                                                                                                                               | Active major bleeding or high risk of bleeding                                                                                                                                                                                                                                             |                                                           |                                   |
|                     |                                                                                                                                                                                                                                                                                                                                               | Severe thrombocytopenia (<25,000/mm <sup>3</sup> )                                                                                                                                                                                                                                         |                                                           |                                   |
|                     |                                                                                                                                                                                                                                                                                                                                               | Acute or chronic renal insufficiency with estimated Creatinine Clearance < 30 ml/min calculated by the modified Cockcroft and Gault formula • Weight < 40 kg •                                                                                                                             |                                                           |                                   |
|                     |                                                                                                                                                                                                                                                                                                                                               | Known allergies to ingredients contained in enoxaparin or allergy to heparin products such as history of heparin induced thrombocytopenia. •                                                                                                                                               |                                                           |                                   |
|                     |                                                                                                                                                                                                                                                                                                                                               | Current pregnancy                                                                                                                                                                                                                                                                          |                                                           |                                   |
|                     | Adults with a body weight of 50-100 kg who required admission to a conventional (non-critical) hospital ward due to COVID-19 pneumonia were included if they also met any of the following criteria: a) baseline oxygen saturation ≤94%, b) D-dimer > 1000 µg/L, c) C Reactive Protein (CRP) > 150 mg/L, or d) interleukin-6 (IL6) > 40 pg/mL | Need for full-dose anticoagulant therapy, active bleeding or situations prone to bleeding, glomerular filtration rate < 30 ml/min/1.73 m <sup>2</sup> , platelet count < 80 × 10 <sup>9</sup> /L, previous heparin-induced thrombocytopenia, and hypersensitivity/intolerance to heparins. | 6180 (3750-11000) / 6860 (4040-13400) / 6200 (3630-12000) | 54.1 (15) / 56.5 (14) / 58.5 (14) |
| PRO-THROMCOVID 2022 |                                                                                                                                                                                                                                                                                                                                               |                                                                                                                                                                                                                                                                                            |                                                           |                                   |

\*Mean + 95% confidence intervals (95%CI), \*\*Median + interquartile range (IQR), \*\*\*Mean and standard deviation (SD)

**Figure S2: Need for ICU admission**

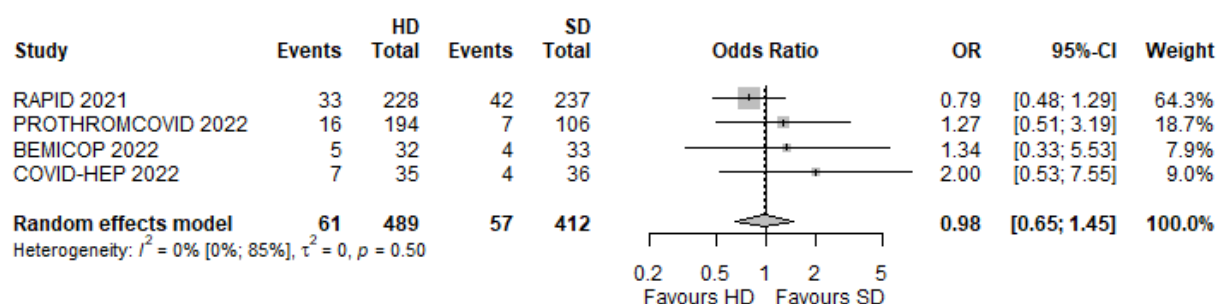

**Figure S3: Progression to ARDS**

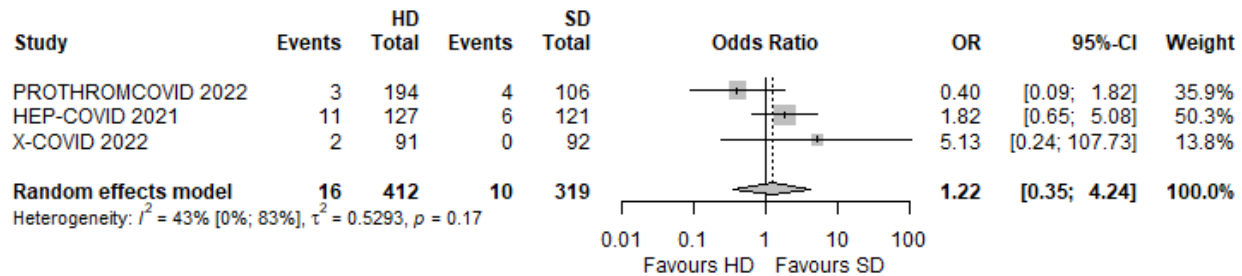

**Figure S4: Composite outcome of death, pulmonary embolism and need for invasive mechanical ventilation**

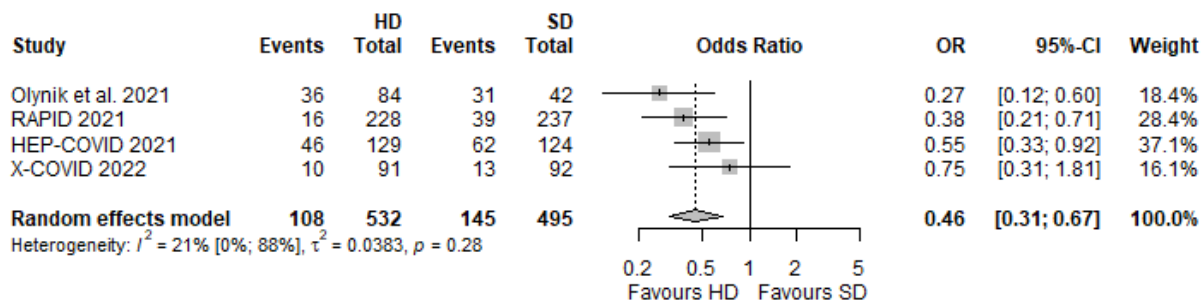

**Figure S5: Risk of bias assesment 2 in the included trials**

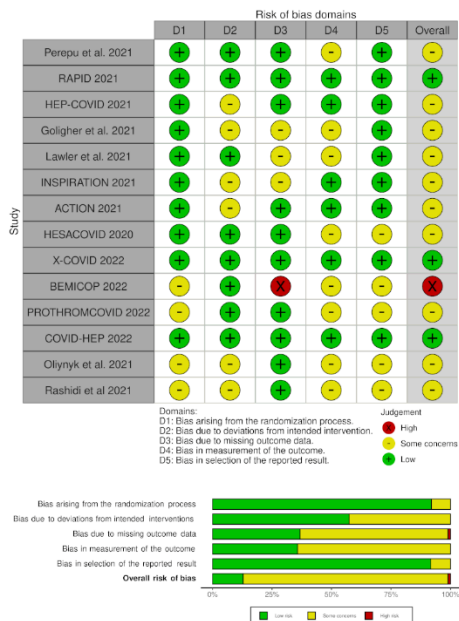

Table S2.: Other clinical outcomes

| Study                                                         | HD group size                                                                                                                                            | Median | IQR          | SD group size | Median | IQR        | OR   | 95%CI     |
|---------------------------------------------------------------|----------------------------------------------------------------------------------------------------------------------------------------------------------|--------|--------------|---------------|--------|------------|------|-----------|
| <b>Organ support-free days</b>                                |                                                                                                                                                          |        |              |               |        |            |      |           |
| Goligher et al. 2021                                          | 536                                                                                                                                                      | 1      | (-1 – 16)    | 567           | 4      | (-1 – 16)  | 0.83 | 0.67-1.03 |
| Lawler et al. 2021                                            | 939                                                                                                                                                      |        |              | 801           |        |            | 1.27 | 1.03-1.58 |
| RAPID 2021                                                    | 228                                                                                                                                                      | 25.8*  | 6.2*         | 237           | 24.1*  | 8.8*       | 1.41 | 0.9-2.21  |
| <b>Ventilator-free days</b>                                   |                                                                                                                                                          |        |              |               |        |            |      |           |
| INSPIRATION 2021                                              | 276                                                                                                                                                      | 30     | (3-30)       | 286           | 30     | (1-30)     | 1.06 | 0.76-1.48 |
| HESACOVID 2020                                                | 10                                                                                                                                                       | 15     | (6-16)       | 10            | 0      | (0-11)     |      |           |
| RAPID 2021                                                    | 228                                                                                                                                                      | 26.5*  | 5.6*         | 237           | 24.7*  | 8.5*       |      |           |
| Lawler et al. 2021                                            | 994                                                                                                                                                      |        |              | 864           |        |            | 1.22 | 0.97-1.55 |
| <b>Length of hospital stay</b>                                |                                                                                                                                                          |        |              |               |        |            |      |           |
| INSPIRATION 2021                                              | 276                                                                                                                                                      | 5      | (2-10)       | 286           | 6      | (3-11)     |      |           |
| HESACOVID 2021                                                | 10                                                                                                                                                       | 31     | (22-35)      | 10            | 30     | (23-38)    |      |           |
| Rashidi et al. 2021                                           | 5                                                                                                                                                        | 8      | (4-19)       | 5             | 11     | (8-12)     |      |           |
| X-COVID 2022                                                  | 91                                                                                                                                                       | 11     | (7-14)       | 92            | 8      | (6-16)     |      |           |
| ACTION 2021                                                   | The number of wins was 28 899 (34·8%) in the therapeutic group and 34 288 (41·3%) in the prophylactic group (win ratio 0·86 [95% CI 0·59–1·22], p=0·40). |        |              |               |        |            |      |           |
| Lawler et al. 2021                                            |                                                                                                                                                          |        |              |               |        |            | 1.03 | 0.94-1.13 |
| <b>Change in PaO2/FiO2 ratio from baseline to 7, 14 days;</b> |                                                                                                                                                          |        |              |               |        |            |      |           |
| <b>PaO2/FiO2 ratio at baseline</b>                            |                                                                                                                                                          |        |              |               |        |            |      |           |
| HESACOVID 2021                                                | 10                                                                                                                                                       | 163    | (133-193)    | 10            | 184    | (146-222)  |      |           |
| <b>PaO2/FiO2 ratio after 7 days</b>                           |                                                                                                                                                          |        |              |               |        |            |      |           |
| HESACOVID 2021                                                | 10                                                                                                                                                       | 209    | (171-247)    | 10            | 168    | (142-195)  |      |           |
| <b>PaO2/FiO2 ratio after 14 days</b>                          |                                                                                                                                                          |        |              |               |        |            |      |           |
| HESACOVID 2021                                                | 10                                                                                                                                                       | 261    | (230-293)    | 10            | 195    | (128-262)  |      |           |
| <b>Change of PaO2/FiO2 ratio within 48 h of enrollment</b>    |                                                                                                                                                          |        |              |               |        |            |      |           |
| Rashidi et al. 2021                                           | 5                                                                                                                                                        | -7.6   | (-14.5-68.9) | 5             | -15.8  | (-28-24.1) |      |           |

\*The values are reported as mean and standard deviation

*Table S3: Latest recommendations of guidelines on anticoagulation in patients infected with COVID-19*

|                                                           | Guidelines                                                                                                                                                                                                                                                                                                                                                                                                                                                                                                                                                                                                                                                                                                                                                                                                                                                                                                                                                                                                                                                                                                                                                                                                                                                                                                                                                                                                                    |
|-----------------------------------------------------------|-------------------------------------------------------------------------------------------------------------------------------------------------------------------------------------------------------------------------------------------------------------------------------------------------------------------------------------------------------------------------------------------------------------------------------------------------------------------------------------------------------------------------------------------------------------------------------------------------------------------------------------------------------------------------------------------------------------------------------------------------------------------------------------------------------------------------------------------------------------------------------------------------------------------------------------------------------------------------------------------------------------------------------------------------------------------------------------------------------------------------------------------------------------------------------------------------------------------------------------------------------------------------------------------------------------------------------------------------------------------------------------------------------------------------------|
| American Society of Hematology                            | <p>“The ASH guideline panel suggests using therapeutic-intensity over prophylactic-intensity anticoagulation for <u>patients with COVID-19-related acute illness</u> who do not have suspected or confirmed VTE or another indication for anticoagulation. Patients with COVID-19-related acute illness are defined as those with clinical features that would typically result in admission to a medicine inpatient ward without requirement for intensive clinical support. Examples include patients with dyspnea or mild to moderate hypoxia (very low certainty).”<sup>1</sup></p> <p>The American Society of Hematology (ASH) guideline panel suggests using prophylactic-intensity over intermediate-intensity or therapeutic-intensity anticoagulation for <u>patients with coronavirus disease 2019 (COVID-19)-related critical illness</u> who do not have suspected or confirmed venous thromboembolism (VTE) Patients with COVID-19-related critical illness are defined as those suffering from an immediately life-threatening condition who would typically be admitted to an intensive care unit (ICU). Examples include patients requiring hemodynamic support, ventilatory support, and renal-replacement therapy. (very low certainty).<sup>1(p19)</sup></p>                                                                                                                                               |
| International Society of Thrombosis and Hemostasis (ISTH) | <p><u>“VTE prophylaxis in non-ICU hospitalized COVID-19 patients:</u></p> <ol style="list-style-type: none"> <li>1.A universal strategy of routine thromboprophylaxis with standard-dose UFH or LMWH should be used after careful assessment of bleed risk, with LMWH as the preferred agent. Intermediate-dose LMWH may also be considered (30% of respondents).</li> <li>2. VTE prophylaxis recommendations should be modified based on extremes of body weight, severe thrombocytopenia (ie platelet counts of <math>50\,000 \times 10^9</math> per liter or <math>25\,000 \times 10^9</math> per liter) or deteriorating renal function.”<sup>2</sup></li> </ol> <p><u>“VTE prophylaxis in sick ICU hospitalized COVID-19 patients:</u></p> <p>Routine thromboprophylaxis with prophylactic-dose UFH or LMWH should be used after careful assessment of bleed risk. Intermediate-dose LMWH (50% of respondents) can also be considered in high risk patients. Patients with obesity as defined by actual body weight or BMI should be considered for a 50% increase in the dose of thromboprophylaxis. Treatment-dose heparin should not be considered for primary prevention until the results of randomized controlled trials are available.</p> <p>Multi-modal thromboprophylaxis with mechanical methods (ie, intermittent pneumatic compression devices) should be considered (60% of respondents).”<sup>2</sup></p> |
| National Institutes of Health (NIH)                       | <p>“The Panel recommends against the use of antiplatelet therapy to prevent COVID-19 progression or death in <u>noncritically ill patients</u></p> <p>There is insufficient evidence for the Panel to recommend either for or against antiplatelet therapy in <u>critically ill patients</u> with COVID-19.</p> <p>For <u>adults who require low-flow oxygen and do not require intensive care unit (ICU)-level care</u>: The Panel recommends using a therapeutic dose of heparin for patients with D-dimer levels above the upper limit of normal, who require low-flow oxygen, and who do not have an increased bleeding risk</p> <p>For <u>adults who require ICU-level care, including those receiving high-flow oxygen</u>:</p> <ul style="list-style-type: none"> <li>• The Panel recommends using a prophylactic dose of heparin as VTE prophylaxis, unless a contraindication exists.</li> <li>• The Panel recommends against the use of an intermediate dose (e.g., enoxaparin 1 mg/kg once daily) or a therapeutic dose of anticoagulation for VTE prophylaxis, except in a clinical trial.</li> <li>• For patients who start on a therapeutic dose of heparin in a non-ICU setting due to COVID-19 and then transfer to the ICU, the Panel recommends switching from the therapeutic dose to a prophylactic dose of heparin, unless VTE is confirmed”<sup>3</sup>.</li> </ul>                                     |
| Anticoagulation Forum                                     | <p>“We recommend against any specific antithrombotic preventative therapy for ambulatory (non-hospitalized) adult patients with mild COVID-19 infection who have no other indication for antithrombotic therapy.</p> <p>We recommend that all patients hospitalized with COVID-19 receive at least standard dose thromboprophylaxis. We suggest that non-heparin anticoagulants (i.e., direct oral anticoagulants) be avoided when therapeutic intensity thromboprophylaxis is utilized.</p> <p>We suggest that clinicians consider the use of therapeutic intensity LMWH or UFH thromboprophylaxis for non-critically ill patients at increased risk of disease progression or thromboembolism and who are not high risk for anticoagulant-related bleeding</p> <p>We recommend that adult patients who are critically ill at the time of hospitalization receive standard dose thromboprophylaxis instead of intermediate- or therapeutic intensity thromboprophylaxis.”<sup>4</sup></p>                                                                                                                                                                                                                                                                                                                                                                                                                                    |
| American College of Chest Physicians                      | <p>“In acutely ill hospitalized patients with COVID-19, we recommend current standard dose anticoagulant thromboprophylaxis over intermediate (LMWH BID or increased weight-based dosing) or full treatment dosing, per existing guidelines.</p>                                                                                                                                                                                                                                                                                                                                                                                                                                                                                                                                                                                                                                                                                                                                                                                                                                                                                                                                                                                                                                                                                                                                                                              |

In critically ill patients with COVID-19, we suggest current standard dose anticoagulant thromboprophylaxis over intermediate (LMWH BID or increased weight-based dosing) or full treatment dosing, per existing guidelines<sup>5</sup>

### Leave-one-out analyses

**Figure S6:** All-cause mortality in cohorts with different disease severity

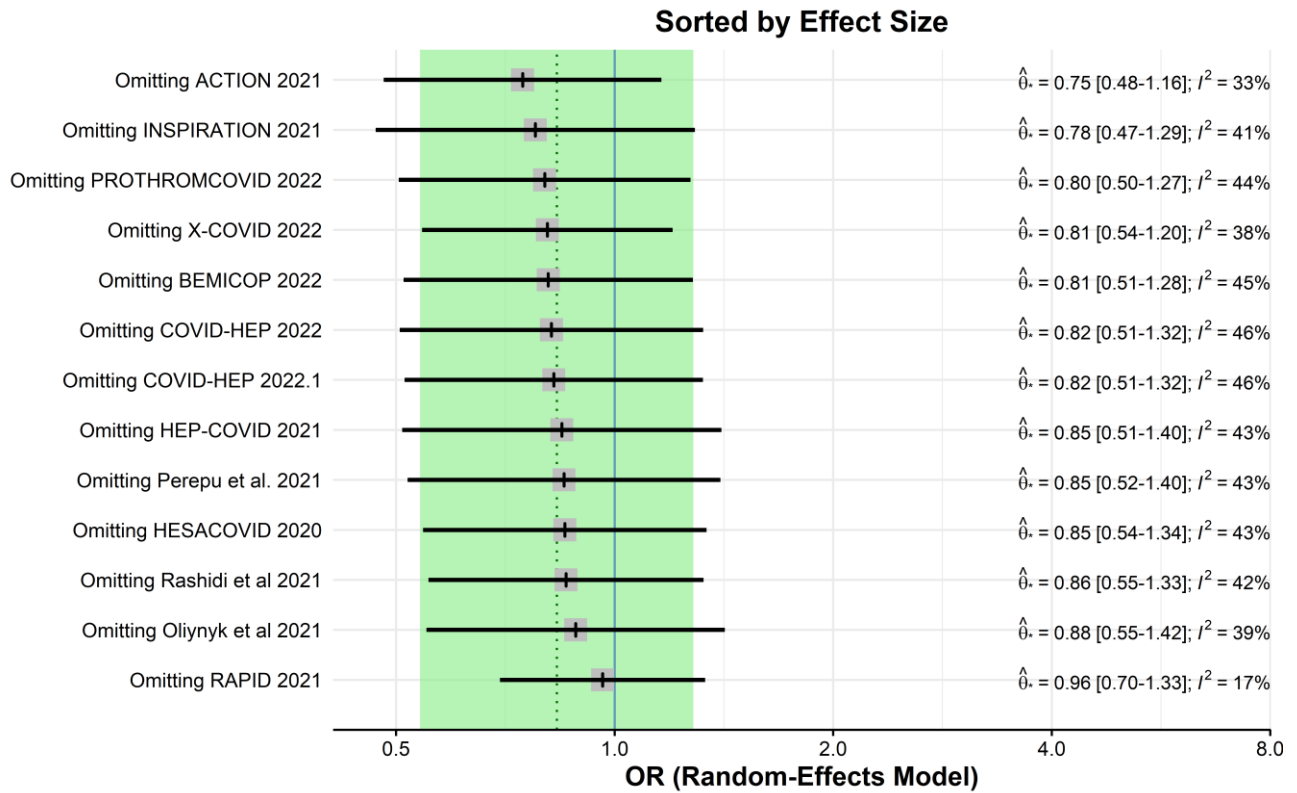

**Figure S7:** All-cause mortality in cohorts with different anticoagulant doses



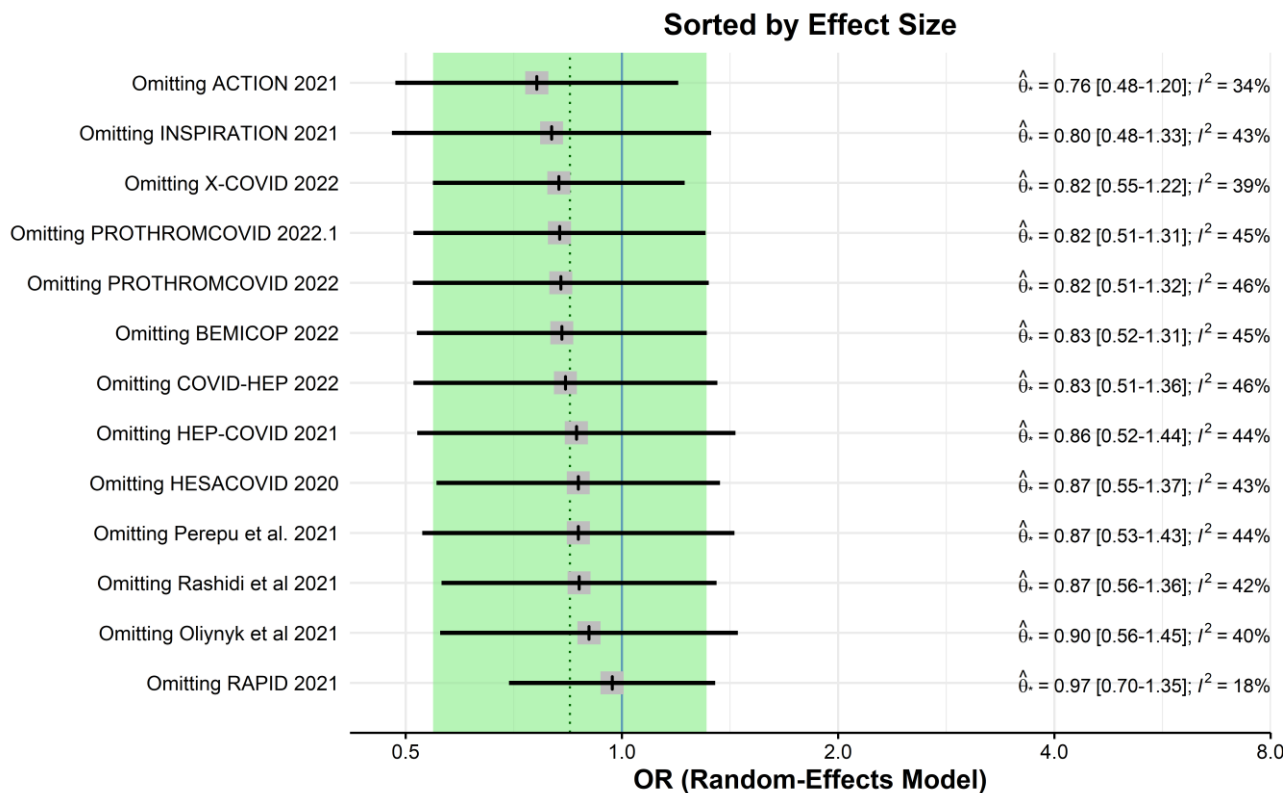

**Figure S8:** All-cause mortality in cohorts with different baseline d-dimer levels

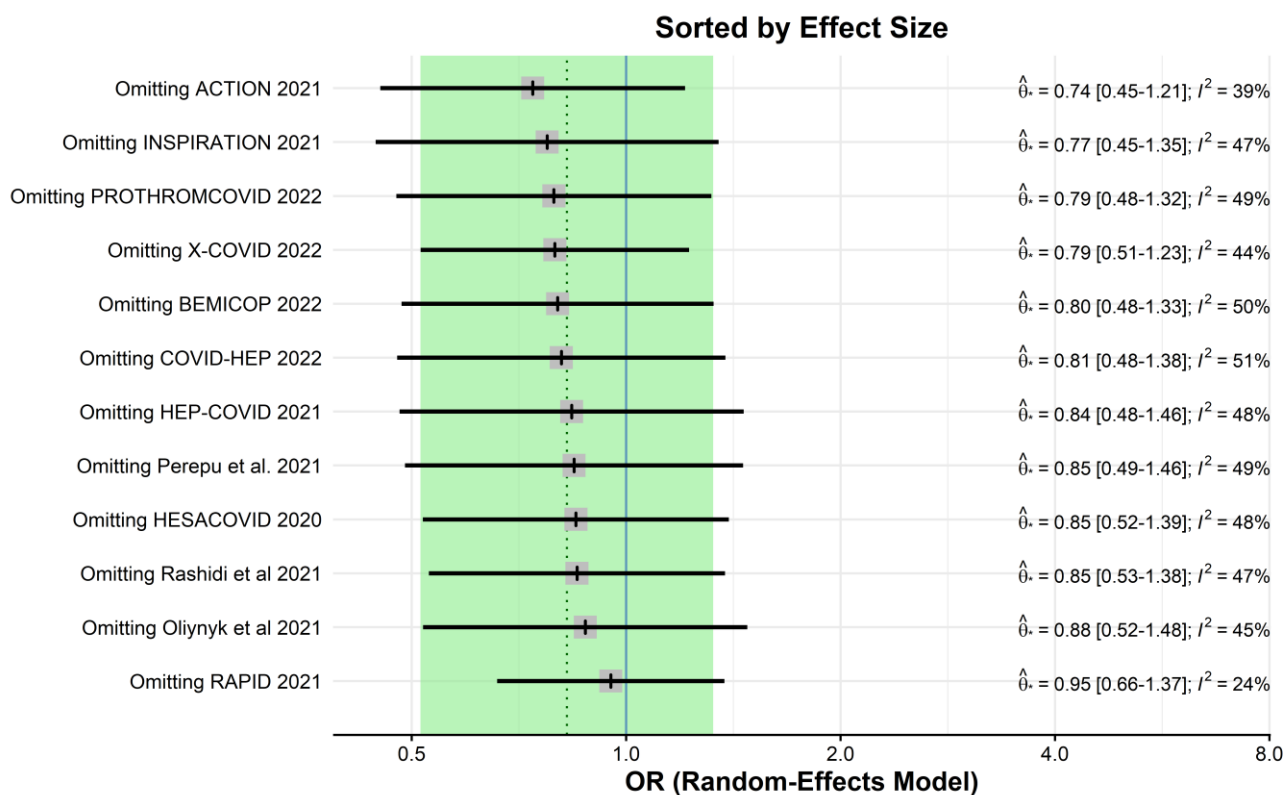

**Figure S9:** Any thrombotic events in cohorts with different disease severity

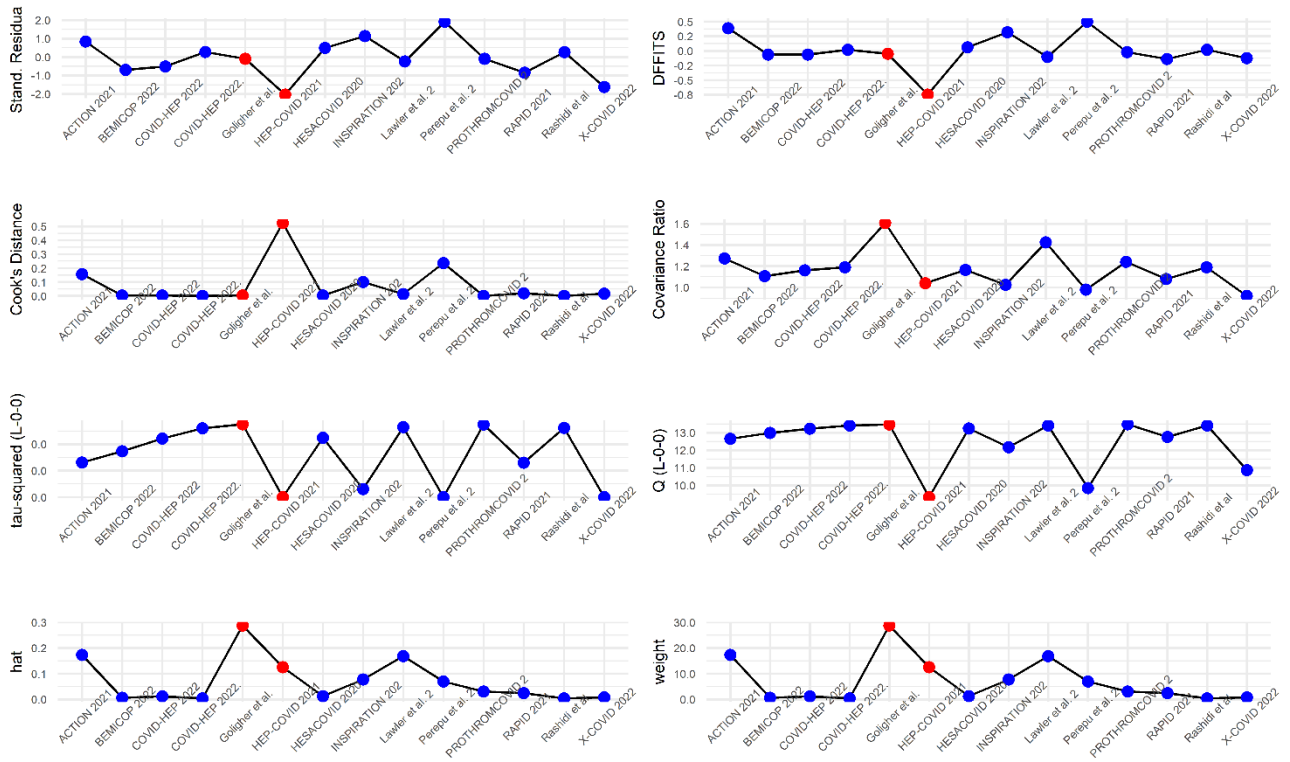

**Figure S10:** Any thrombotic events in cohorts with different anticoagulant doses

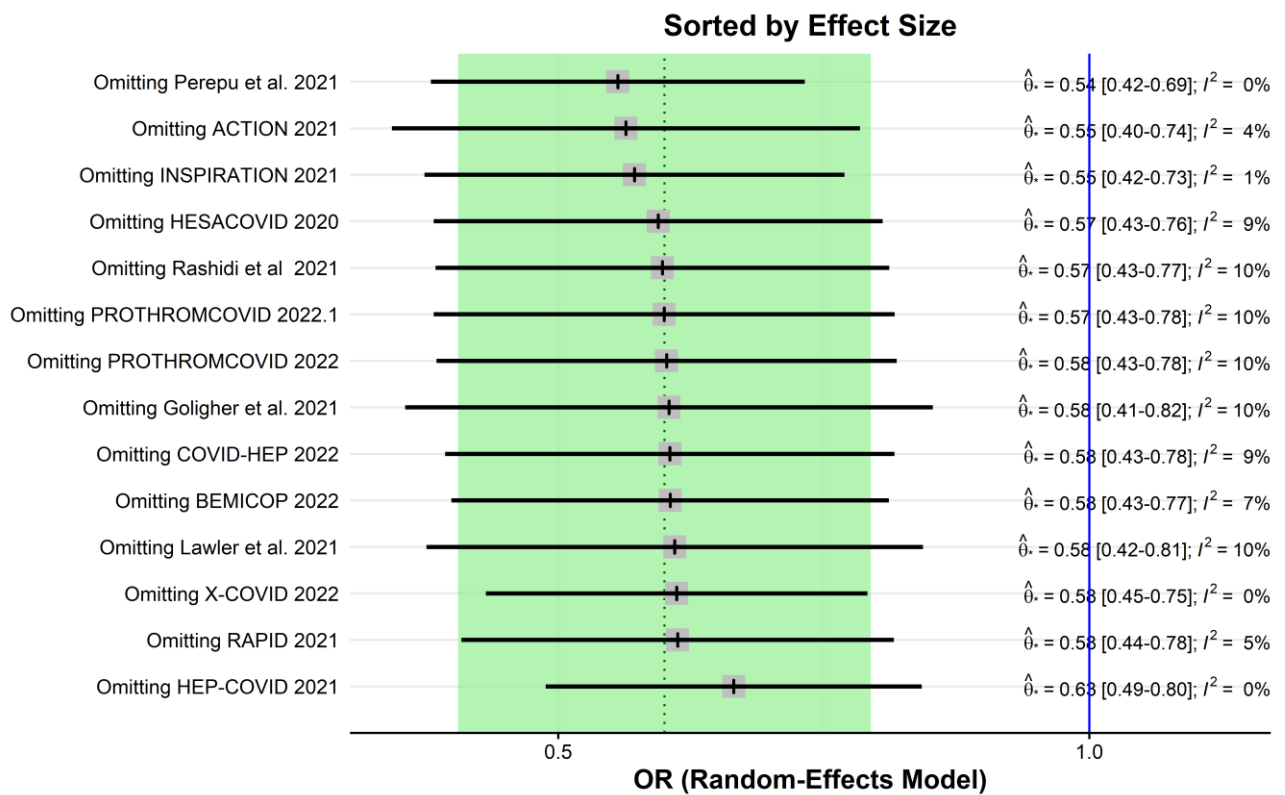

**Figure S11:** Major bleeding events in cohorts with different disease severity

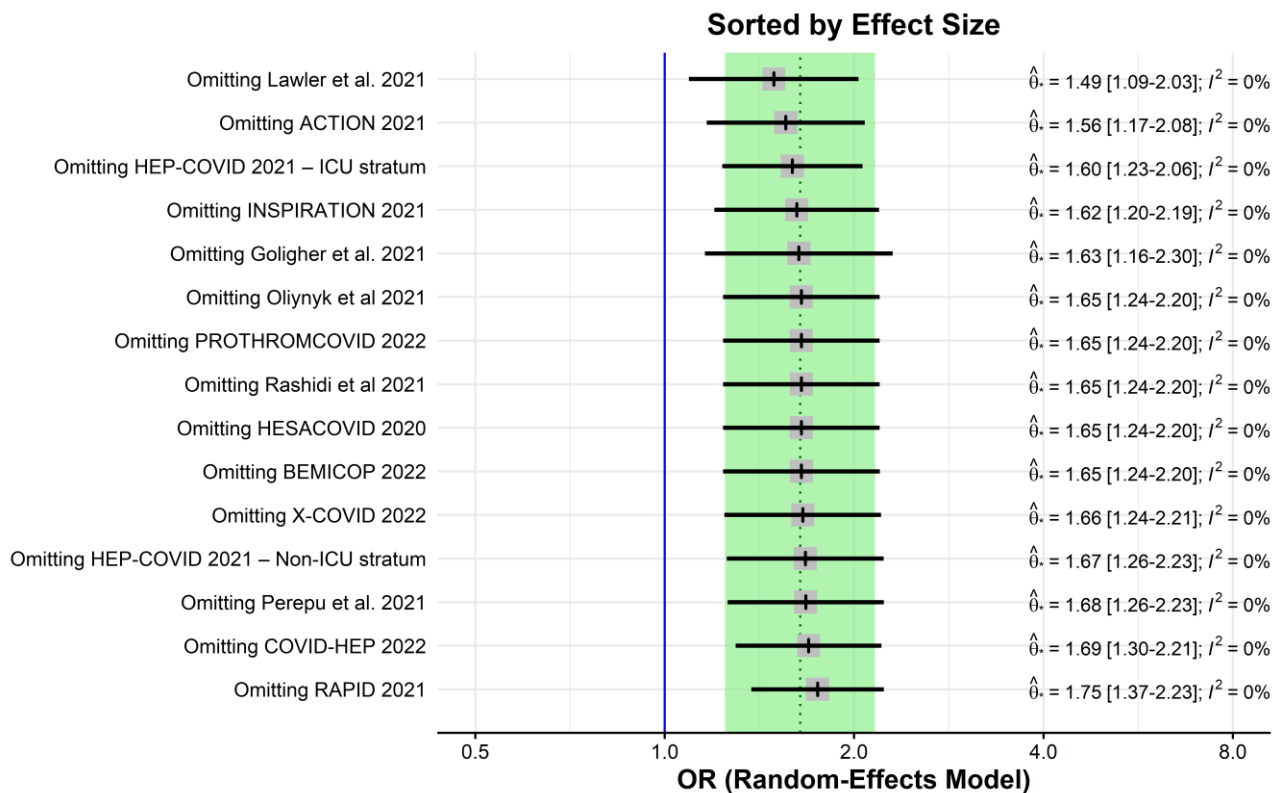

**Figure S12:** Major bleeding events in cohorts with different anticoagulant doses

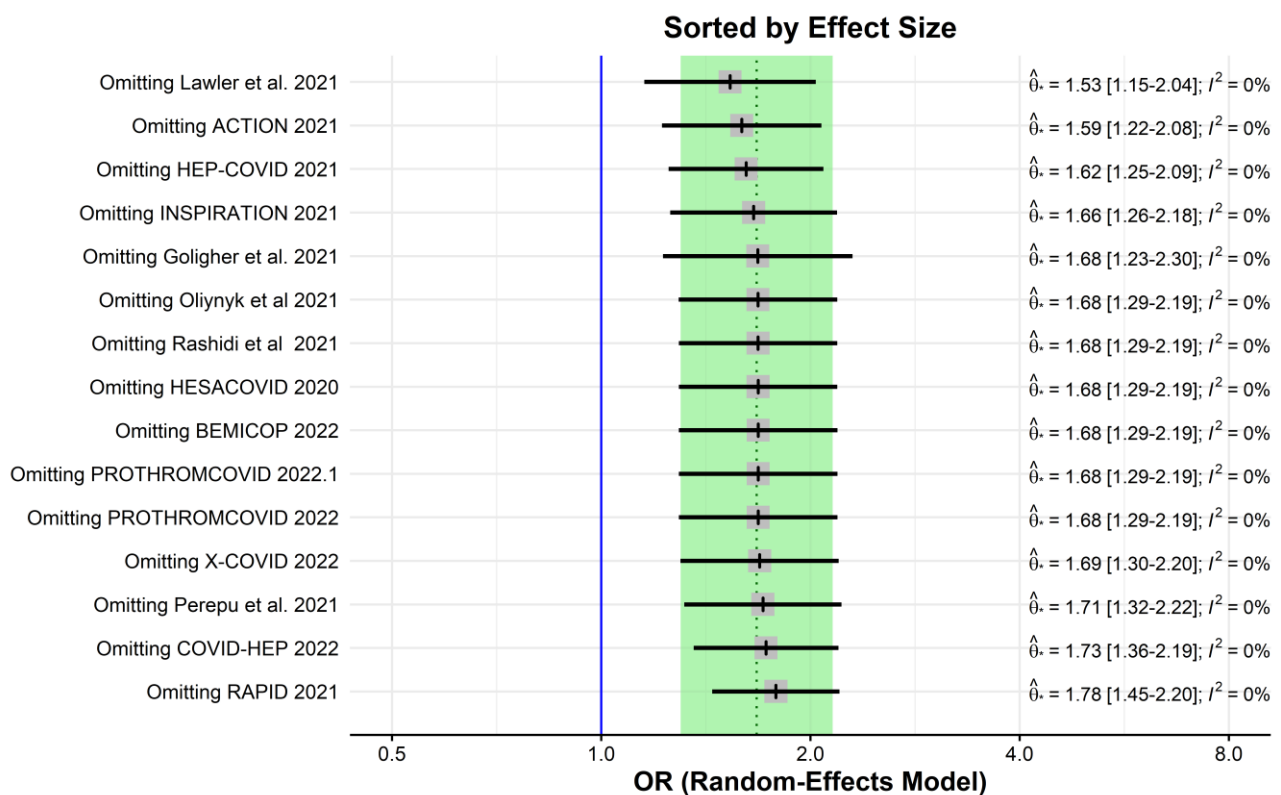

**Figure S13:** The need for invasive mechanical ventilation

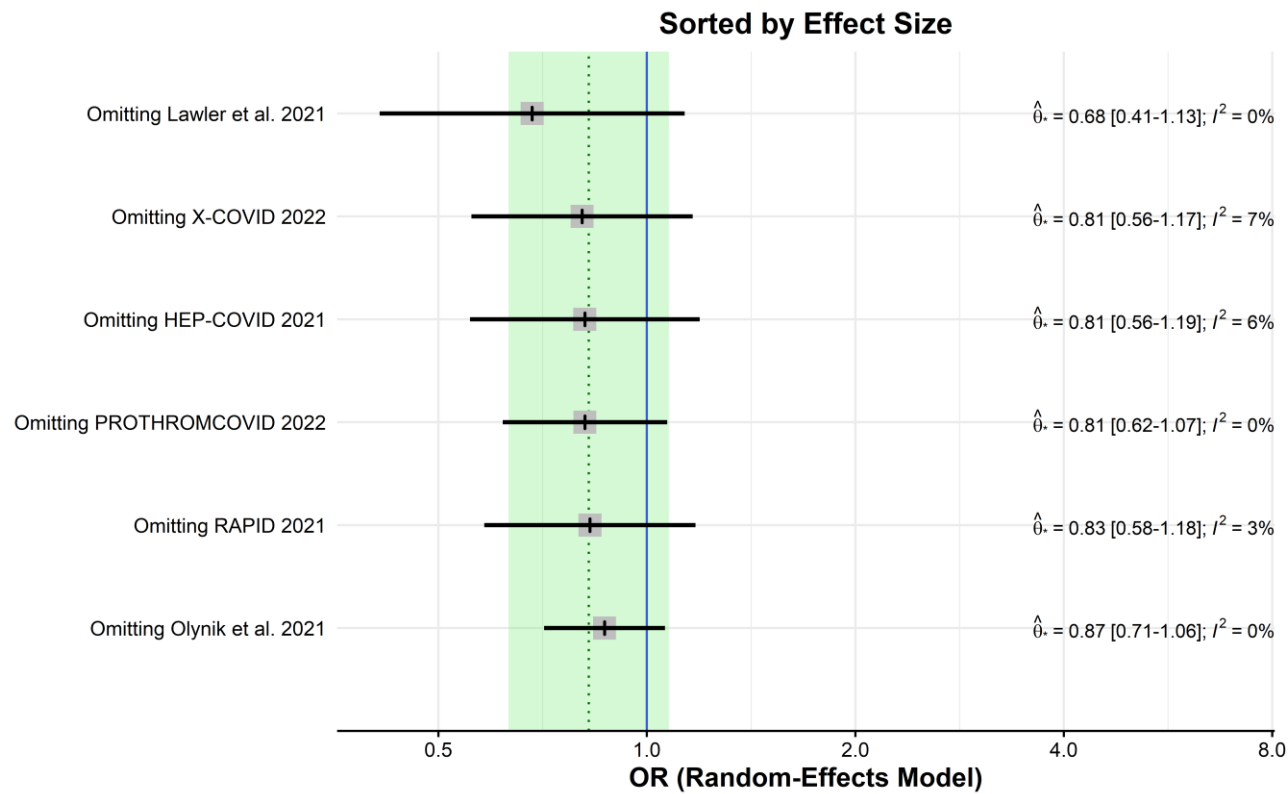

# **Excluded articles during full text selection (search on 18th October 2021)**

| Article title                                                                                                                                                                                                           | Author              | Year | DOI                                      | Eligibility | Reason for exclusion         |
|-------------------------------------------------------------------------------------------------------------------------------------------------------------------------------------------------------------------------|---------------------|------|------------------------------------------|-------------|------------------------------|
| [Anticoagulation in patients with COVID-19].                                                                                                                                                                            | Pekrul, I           | 2021 | DO - 10.1007/s00108-021-01190-y          | Excluded    | Commentary                   |
| Anticoagulation strategies and risk of bleeding events in critically ill COVID-19 patientsEstrategias de anticoagulación y riesgo de sangrado en pacientes ingresados en una Unidad de Cuidados Intensivos por COVID-19 | Gabara, Cristina    | 2021 | DO - 10.1016/j.med.2021.07.004           | Excluded    | Review                       |
| [Not Available]                                                                                                                                                                                                         | Fumeaux, Thierry    | 2021 |                                          | Excluded    | Comment on INSPIRATION study |
| Not Available]                                                                                                                                                                                                          |                     | 2021 | DO - 10.1055/a-1544-3994                 | Excluded    | Video recording              |
| A possible benefit from therapeutic anticoagulation in patients with coronavirus disease 2019: the Dolo hospital experience in Veneto, Italy.                                                                           | Secco, Eleonora     | 2020 | DO - 10.33963/KP.15489                   | Excluded    | Observational study          |
| Acute thromboembolic events (TE) within 30 days of COVID-19 infection in cancer patients                                                                                                                                | Zavras, P D         | 2021 | DO - 10.1200/JCO.2021.39.15_suppl.e18691 | Excluded    | Meeting abstract             |
| Anticoagulation and bleeding risk in patients with COVID-19.                                                                                                                                                            | Musoke, Nancy       | 2020 | 10.1016/j.thromres.2020.08.035           | Excluded    | Observational study          |
| Anticoagulation Before Hospitalization Is a Potential Protective Factor for COVID-19: Insight From a French Multicenter Cohort Study.                                                                                   | Chocron, Richard    | 2021 | DO - 10.1161/JAHA.120.018624             | Excluded    | Observational study          |
| Anticoagulation in COVID-19: a single-center retrospective study.                                                                                                                                                       | Roomi, Sohaib Sanan | 2021 | 10.1080/20009666.2020.1835297            | Excluded    | Observational study          |
| Anticoagulation in COVID-19: Effect of Enoxaparin, Heparin, and Apixaban on Mortality.                                                                                                                                  | Billett, H          | 2020 | 10.1055/s-0040-1720978                   | Excluded    | Observational study          |
| Anticoagulation management and outcomes in COVID-19 patients: a multi-center retrospective cohort study                                                                                                                 | Kaur, J             | 2020 | 10.1182/blood-2020-140997                | Excluded    | Observational study          |
| Anticoagulation Therapy in Patients With Coronavirus Disease 2019: Results From a Multicenter International Prospective Registry (Health Outcome Predictive Evaluation for Corona Virus Disease 2019 [HOPE-COVID19]).   | Santoro, Francesco  | 2021 | 10.1093/eurheartj/suaa198                | Excluded    | Observational study          |

|                                                                                                                                                                                   |                         |      |                                 |          |                     |
|-----------------------------------------------------------------------------------------------------------------------------------------------------------------------------------|-------------------------|------|---------------------------------|----------|---------------------|
| Anticoagulation therapy using unfractionated heparin at a therapeutic dose for coronavirus disease 2019 patients with severe pneumonia: a retrospective historical control study. | Takayama, Wataru        | 2021 | 10.1002/ams2.679                | Excluded | Observational study |
| ANTICOAGULATION, BLEEDING, AND IMMUNOTHROMBOSIS IN CRITICALLY ILL PATIENTS WITH COVID-19                                                                                          | Paez Vargas, J          | 2021 | 10.1016/j.chest.2021.07.926     | Excluded | Observational study |
| Anticoagulation, Bleeding, Mortality, and Pathology in Hospitalized Patients With COVID-19.                                                                                       | Nadkarni, Girish N      | 2020 | 10.1016/j.jacc.2020.08.041      | Excluded | Observational study |
| Association of anticoagulation dose and survival in hospitalized COVID-19 patients: A retrospective propensity score-weighted analysis.                                           | Ionescu, Filip          | 2021 | 10.1111/ejh.13533               | Excluded | Observational study |
| Association of Treatment Dose Anticoagulation With In-Hospital Survival Among Hospitalized Patients With COVID-19.                                                                | Paranjpe, Ishan         | 2020 | 10.1016/j.jacc.2020.05.001      | Excluded | Observational study |
| Attention should be paid to venous thromboembolism prophylaxis in the management of COVID-19.                                                                                     | Wang, Tao               | 2020 | 10.1016/S2352-3026(20)30109-5   | Excluded | Observational study |
| Beneficial Effects of Intermediate Dosage of Anticoagulation Treatment on the Prognosis of Hospitalized COVID-19 Patients: The ETHRA Study.                                       | Poulakou, Garyphallia   | 2021 | 10.21873/in vivo.12305          | Excluded | Observational study |
| Bleeding prevalence in COVID-19 patients receiving intensive antithrombotic prophylaxis.                                                                                          | Kessler C.              | 2020 | 10.1007/s11239-020-02244-y      | Excluded | Observational study |
| Bleeding risk by intensity of anticoagulation in critically ill patients with COVID-19: A retrospective cohort study.                                                             | Halaby, Rim             | 2021 | 10.1111/jth.15310               | Excluded | Observational study |
| Bleeding risk in hospitalized patients with COVID-19 receiving intermediate- or therapeutic doses of thromboprophylaxis.                                                          | Demelo-Rodriguez, Pablo | 2021 | 10.1111/jth.15400               | Excluded | Observational study |
| Clinical and therapeutic outcomes of COVID-19 intensive care units (ICU) patients: a retrospective study in Ghana.                                                                | Afriyie-Mensah, Jane    | 2021 | 10.11604/pamj.2021.38.107.27131 | Excluded | Observational study |
| Clinical Course and Risk Factors for In-Hospital Mortality of 205 Patients with                                                                                                   | Turrini, Mauro          | 2021 | 10.3390/vaccines9060640         | Excluded | Observational study |

|                                                                                                                                                                                           |                   |      |                                 |          |                       |  |
|-------------------------------------------------------------------------------------------------------------------------------------------------------------------------------------------|-------------------|------|---------------------------------|----------|-----------------------|--|
| SARS-CoV-2 Pneumonia in Como, Lombardy Region, Italy.                                                                                                                                     |                   |      |                                 |          |                       |  |
| Clinical outcome with different doses of low-molecular-weight heparin in patients hospitalized for COVID-19.                                                                              | Mennuni, Marco G  | 2021 | 10.1007/s11239-021-02401-x      | Excluded | Observational study   |  |
| Clinical Outcomes With the Use of Prophylactic Versus Therapeutic Anticoagulation in Coronavirus Disease 2019.                                                                            | Motta, Jishu Kaul | 2020 | 10.1097/CCE.00000000000000309   | Excluded | Observational study   |  |
| Combined anticoagulant and antiplatelet therapy is associated with an improved outcome in hospitalised patients with COVID-19: a propensity matched cohort study.                         | Matli, Kamal      | 2021 | 10.1136/openhrt-2021-001785     | Excluded | Observational study   |  |
| Comparison between Prophylactic versus Therapeutic Doses of Low-Molecular-Weight Heparin in Severely Ill Coronavirus Disease 2019 Patients in Relation to Disease Progression and Outcome | Elmelhat, A       | 2020 | 10.1159/000511163               | Excluded | Observational study   |  |
| Comparison of standard prophylactic and preemptive therapeutic low molecular weight heparin treatments in hospitalized patients with COVID-19.                                            | Copur, B          | 2021 | 10.4149/BLL_2021_100            | Excluded | Observational study   |  |
| Consequences of impaired coagulation and impact of antithrombotic prophylaxis in elderly patients with coronavirus disease (COVID-19)                                                     | Asuncion, C G     | 2020 | 10.1007/s41999-020-00428-6      | Excluded | Full text unavailable |  |
| Continuous Infusion Low-Dose Unfractionated Heparin for the Management of Hypercoagulability Associated With COVID-19                                                                     | Li, M             | 2020 | 10.1177/0897190020966207        | Excluded | Observational study   |  |
| COVID-19 associated coagulopathy: Thrombosis, hemorrhage and mortality rates with an escalated-dose thromboprophylaxis strategy.                                                          | Daughety, Molly M | 2020 | 10.1016/j.throm-res.2020.10.004 | Excluded | Observational study   |  |
| Covid-19 thromboembolic complications and risk factors for poor outcomes: Experience from a single ICU                                                                                    | Bullman, L        | 2020 | 10.1186/s40635-020-00354-8      | Excluded | Observational study   |  |
| COVID-19-associated coagulopathy: safety and efficacy of prophylactic anticoagulation therapy in hospitalized adults with COVID-19                                                        | Chambers, I       | 2020 | 10.1182/blood-2020-141951       | Excluded | Full text unavailable |  |

|                                                                                                                                                                                                                                                                 |                          |      |                                 |          |                       |
|-----------------------------------------------------------------------------------------------------------------------------------------------------------------------------------------------------------------------------------------------------------------|--------------------------|------|---------------------------------|----------|-----------------------|
| COVID-19-RELATED COAGULOPATHY IN CRITICALLY ILL PATIENTS: EXPERIENCE FROM AN ACADEMIC MEDICAL CENTER                                                                                                                                                            | Thayyil Jayakrishnan, T  | 2021 | 10.1016/j.chest.2021.07.963     | Excluded | Full text unavailable |
| COVID-19 Infection in Critically Ill Patients Carries a High Risk of Venous Thrombo-embolism.                                                                                                                                                                   | Bellmunt-Montoya, Sergi  | 2021 | 10.1016/j.ejvs.2020.12.015      | Excluded | Observational study   |
| Deep vein thrombosis in noncritically ill patients with coronavirus disease 2019 pneumonia: deep vein thrombosis in non-intensive care unit patients.                                                                                                           | Jimenez-Guiu, Xavier     | 2021 | 10.1016/j.jvsv.2020.08.028      | Excluded | Observational study   |
| Dosing of thromboprophylaxis and mortality in critically ill COVID-19 patients.                                                                                                                                                                                 | Jonmarker, Sandra        | 2020 | 10.1186/s13054-020-03375-7      | Excluded | Observational study   |
| Effect of Antithrombotic Therapy on Clinical Outcomes in Outpatients With Clinically Stable Symptomatic COVID-19: The ACTIV-4B Randomized Clinical Trial.                                                                                                       | Connors, Jean M          | 2021 | 10.1001/jama.2021.17272         | Included |                       |
| Effect of Intermediate-Dose vs Standard-Dose Prophylactic Anticoagulation on Thrombotic Events, Extracorporeal Membrane Oxygenation Treatment, or Mortality Among Patients With COVID-19 Admitted to the Intensive Care Unit: the INSPIRATION Randomized Clinic | Sadeghipour, P           | 2021 | 10.1001/jama.2021.4152          | Included |                       |
| Effectiveness of therapeutic heparin versus prophylactic heparin on death, mechanical ventilation, or intensive care unit admission in moderately ill patients with covid-19 admitted to hospital: RAPID randomised clinical trial.                             | Sholzberg, Michelle      | 2021 | 10.1136/bmj.n2400               | Included |                       |
| Efficacy and Safety of D-dimer, Weight, and Renal Function-Adjusted Thromboprophylaxis in Patients with Coronavirus Disease 2019 (COVID-19).                                                                                                                    | Arachchillage, Deepa R J | 2021 |                                 | Excluded | Observational study   |
| Efficacy and Safety of Therapeutic-Dose Heparin vs Standard Prophylactic or Intermediate-Dose Heparins for Thromboprophylaxis in High-risk Hospitalized Patients With COVID-19: The HEP-COVID Randomized Clinical Trial.                                        | Spyropoulos, Alex C      | 2021 | 10.1001/jamainternmed.2021.6203 | Included |                       |



|                                                                                                                                                                                     |                        |      |                                            |          |                         |
|-------------------------------------------------------------------------------------------------------------------------------------------------------------------------------------|------------------------|------|--------------------------------------------|----------|-------------------------|
| Empiric Therapeutic Anticoagulation and Mortality in Critically Ill Patients With Respiratory Failure From SARS-CoV-2: A Retrospective Cohort Study.                                | Ferguson, John         | 2020 | 10.1002/jcph.1749                          | Excluded | Observational study     |
| Empiric use of anticoagulation in hospitalized patients with COVID-19: a propensity score-matched study of risks and benefits.                                                      | Yu, Bo                 | 2021 | 10.1186/s40364-021-00283-y                 | Excluded | Observational study     |
| Enhanced thromboprophylaxis dosing or therapeutic anticoagulation are not associated with a decrease in thrombo-embolic events in patients with COVID19: A single centre experience | Karimi, A M            | 2020 | 10.1186/s40635-020-00354-8                 | Excluded | Full text unavailable   |
| Evaluation of a patient specific, targeted-intensity pharmacologic thromboprophylaxis protocol in hospitalized patients with COVID-19.                                              | Farrar, Julie E        | 2021 | 10.1007/s11239-021-02552-x                 | Excluded | Observational study     |
| EVALUATION OF THROMBOEMBOLIC EVENTS AND ANTICOAGULANT STRATEGIES IN PATIENTS WITH COVID-19: A RETROSPECTIVE ANALYSIS                                                                | Lyn Dela Cruz, J       | 2021 | 10.1016/j.chest.2021.07.1024               | Excluded | Full text unavailable   |
| Hemorrhagic stroke and anticoagulation in COVID-19.                                                                                                                                 | Dogra, Sid-dhant       | 2020 | 10.1016/j.jstrokecerebrovasdis.2020.104984 | Excluded | Observational study     |
| Hemorrhagic stroke in the setting of COVID-19 is associated with anticoagulation use                                                                                                | Kvernland, A           | 2021 | 10.1161/str.52.suppl-1.P100                | Excluded | Full text unavailable   |
| Heparin in COVID-19 Patients Is Associated with Reduced In-Hospital Mortality: the Multicenter Italian CORIST Study                                                                 | Di Castelnuovo         | 2021 | DOI: 10.1055/a-1347-6070                   | Excluded | Observational study     |
| Heparin for Moderately Ill Patients with Covid-19.                                                                                                                                  | Sholzberg, Michelle    | 2021 | 10.1101/2021.07.08.21259351                | Included | RAPID trial - duplicate |
| High incidence of venous thromboembolic events in anticoagulated severe COVID-19 patients.                                                                                          | Llitjos, Jean-François | 2020 | 10.1111/jth.14869                          | Excluded | Observational study     |
| High risk of thrombosis in patients with severe SARS-CoV-2 infection: a multicenter prospective cohort study                                                                        | helms J.               | 2020 | 10.1007/s00134-020-06062-x                 | Excluded | Observational study     |
| Higher anticoagulation targets and risk of thrombotic events in severe COVID-19 patients: bi-center cohort study.                                                                   | Helms, Julie           | 2021 | 10.1186/s13613-021-00809-5                 | Excluded | Observational study     |

|                                                                                                                                                                        |                       |      |                               |          |                       |
|------------------------------------------------------------------------------------------------------------------------------------------------------------------------|-----------------------|------|-------------------------------|----------|-----------------------|
| Higher heparin dosages reduce thrombo-embolic complications in patients with COVID-19 pneumonia.                                                                       | Carallo, Claudio      | 2021 | 10.1136/jim-2020-001628       | Excluded | Observational study   |
| Higher Intensity Thromboprophylaxis Regimens and Pulmonary Embolism in Critically Ill Coronavirus Disease 2019 Patients.                                               | Taccone, Fabio Silvio | 2020 | 10.1097/CCM.00000000000004548 | Excluded | Observational study   |
| Hospital mortality and safety of therapeutic vs. prophylactic doses of low molecular weight heparin in COVID-19 patients                                               | Aschieri, D           | 2020 | 10.1093/eurheartj/suaa198     | Excluded | Full text unavailable |
| IMPACT OF FULL DOSE ANTICOAGULATION IN HOSPITALIZED PRE-DOMINANTLY BLACK PATIENTS WITH SARS-COV-2 INFECTION: a RETROSPECTIVE SINGLE CENTER EXPERIENCE                  | Samaha G.             | 2020 | 10.1016/j.chest.2020.09.017   | Excluded | Full text unavailable |
| Impact of High-Dose Prophylactic Anticoagulation in Critically Ill Patients With COVID-19 Pneumonia.                                                                   | Tacquard, Charles     | 2021 | 10.1016/j.chest.2021.01.017   | Excluded | Observational study   |
| IMPACT OF THROMBOPROPHYLACTIC STRATEGY ON BLEEDING RISK AMONG IN- AND OUTPATIENTS WITH COVID-19                                                                        | Svet M                | 2021 | 10.1016/S0735-1097(21)04466-1 | Excluded | Full text unavailable |
| Impact of treatment and anticoagulation on thrombosis in COVID-19 patients                                                                                             | Warrior, S            | 2020 | 10.1182/blood-2020-137707     | Excluded | Full text unavailable |
| In COVID-19, therapeutic vs. prophylactic anticoagulation did not improve clinical outcomes and increased bleeding.                                                    | Diep, Robert          | 2021 | 10.7326/ACPJ202110190-112     | Excluded | Full text unavailable |
| Incidence and mortality of thrombotic complications ICU patients with COVID-19                                                                                         | Llorente Ruiz, B      | 2020 | 10.1186/s40635-020-00354-8    | Excluded | Full text unavailable |
| Incidence and risk factors associated with bleeding complications in COVID patients                                                                                    | Acha Aranda, A        | 2020 | 10.1186/s40635-020-00354-8    | Excluded | Full text unavailable |
| Incidence of deep vein thrombosis through an ultrasound surveillance protocol in patients with COVID-19 pneumonia in non-ICU setting: A multicenter prospective study. | Pieralli, Filippo     | 2021 | 10.1371/journal.pone.0251966  | Excluded | Observational study   |
| Incidence of Venous Thromboembolism and Effect of Anticoagulant Dosing in Hospitalized COVID-19 Patients.                                                              | Kumar, Gagan          | 2020 | 10.14740/jh836                | Excluded | Observational study   |

|                                                                                                                                                        |                     |      |                                    |          |                                  |
|--------------------------------------------------------------------------------------------------------------------------------------------------------|---------------------|------|------------------------------------|----------|----------------------------------|
| Incidence of Venous Thromboembolism in Critically Ill Coronavirus Disease 2019 Patients Receiving Prophylactic Anticoagulation.                        | Trigonis, Russell A | 2020 | 10.1097/CCM.00000000000004472      | Excluded | Observational study              |
| Incidence of venous thromboembolism in hospitalized patients with COVID-19.                                                                            | Middeldorp, Saskia  | 2020 | 10.1111/jth.14888                  | Excluded | Observational study              |
| Increased anticoagulation reduces proximal deep vein thrombosis in mechanically ventilated COVID-19 patients: Venous thrombosis prevention & COVID-19. | Voicu, Sebastian    | 2021 | 10.1016/j.jinf.2020.11.019         | Excluded | Observational study              |
| Increasing dosages of low-molecular-weight heparin in hospitalized patients with Covid-19.                                                             | Martinelli, I       | 2021 | 10.1007/s11739-020-02585-9         | Excluded | Observational study              |
| Increasing doses of anticoagulation are associated with improved survival in hospitalized COVID-19 patients                                            | Ionescu, F          | 2020 | 10.1182/blood-2020-134835          | Excluded | Full text unavailable            |
| Intensity of anticoagulation and survival in patients hospitalized with COVID-19 pneumonia.                                                            | Hsu, Andrew         | 2020 | 10.1016/j.thromres.2020.09.030     | Excluded | Observational study              |
| Intermediate versus standard dose heparin prophylaxis in COVID-19 ICU patients: A propensity score-matched analysis.                                   | A Moll, Matthew     | 2021 | 10.1016/j.thromres.2021.04.009     | Excluded | Observational study              |
| Intermediate vs Standard-dose Prophylactic Anticoagulation in Patients with COVID-19 Admitted to ICU: ninety-day Results from the INSPIRATION Trial    |                     | 2021 | 10.1055/a-1485-2372                | Included | Same study pool, another outcome |
| Intermediate-dose anticoagulation, aspirin, and in-hospital mortality in COVID-19: a propensity score-matched analysis.                                | Meizlish, Matthew L | 2021 | 10.1101/2021.01.12.21249577        | Excluded | Observational study              |
| Is there a possible benefit in therapeutic anticoagulation for all COVID-19 patients?                                                                  | Aly, H              | 2020 | 10.1186/s40635-020-00354-8         | Excluded | Full text unavailable            |
| Low incidence of thrombotic events in SARS-CoV-2 mechanically ventilated anticoagulated patients                                                       | Perot, A            | 2020 | 10.1186/s40635-020-00354-8         | Excluded | Full text unavailable            |
| Low molecular weight heparin and 28-day mortality among patients with coronavirus disease 2019: A cohort study in the early epidemic era.              | Qin, Wei            | 2021 | 10.1016/j.thromres.2020.11.020     | Excluded | Observational study              |
| Low molecular weight heparin at high dose impacts on outcome of COVID-19                                                                               | Bonetti, S          | 2021 | 10.1097/01.hjh.0000746768.43077.0d | Excluded | Full text unavailable            |

|                                                                                                                                                 |                             |      |                                         |          |                       |  |
|-------------------------------------------------------------------------------------------------------------------------------------------------|-----------------------------|------|-----------------------------------------|----------|-----------------------|--|
| hospitalized patients, while standard dose doesn't                                                                                              |                             |      |                                         |          |                       |  |
| Low molecular weight heparin is useful in adult COVID-19 inpatients. Experience during the first Spanish wave: observational study.             | Gonzalez-Porras, Jose Ramon | 2021 | 10.1590/1516-3180.2021.0098.R1.08062021 | Excluded | Observational study   |  |
| Low Rate of Thrombosis in Mexican Patients with COVID-19 Infection. a Benefit of Higher Doses Anticoagulants or a Sub Diagnosis?                | Marquez, F G                | 2020 | 10.1182/blood-2020-136240               | Excluded | Full text unavailable |  |
| Low-molecular-weight heparin dosing and anti-xa level monitoring in critically ill COVID-19 adults                                              | Mioni, R                    | 2021 | 10.1097/01.ccm.0000727112.58380.5e      | Excluded | Full text unavailable |  |
| Major bleeding complications in critically ill patients with COVID-19 pneumonia.                                                                | Godier, Anne                | 2021 | 10.1007/s11239-021-02403-9              | Excluded | Observational study   |  |
| Management of heparin in COVID-19 patients: A single-centre experience                                                                          | Sottilotta, G               | 2020 | 10.2450/2020.S4                         | Excluded | Full text unavailable |  |
| Missed cerebrovascular events during prolonged sedation for COVID-19 pneumonia.                                                                 | Bruce, Samuel S             | 2021 | 10.1016/j.jocn.2021.01.008              | Excluded | Observational study   |  |
| Mortality and transfusion requirements in COVID-19 hospitalized italian patients according to severity of the disease                           | Grandone, E                 | 2021 | 10.3390/jcm10020242                     | Excluded | Observational study   |  |
| Outcomes in COVID-19 patients on treatment dose anti- coagulation compared to prophylactic dose anti-coagulation                                | Kodama, R                   | 2020 | 10.1182/blood-2020-142552               | Excluded | Observational study   |  |
| Pattern of anticoagulation prescription for patients with Covid-19 acute respiratory distress syndrome admitted to ICU. Does it impact outcome? | Nadeem, Rashid              | 2021 | 10.1016/j.hrtlng.2020.10.009            | Excluded | Observational study   |  |
| Predictors of acute deep venous thrombosis in patients hospitalized for COVID-19.                                                               | Riyahi, Sadjad              | 2021 | 10.1097/MD.000000000000027216           | Excluded | Observational study   |  |
| Preliminary Experience With Low Molecular Weight Heparin Strategy in COVID-19 Patients.                                                         | Paolisso, Pasquale          | 2020 | 10.3389/fphar.2020.01124                | Excluded | Observational study   |  |
| Prevalence and Predictors of Venous Thromboembolism or Mortality in Hospitalized COVID-19 Patients.                                             | Cohen, Stuart L             | 2021 | 10.1055/a-1366-9656                     | Excluded | Observational study   |  |
| Prevalence of deep vein thrombosis in Italian Covid-19 hospitalized patients                                                                    | Baccellieri, D              | 2020 | 10.2450/2020.S4                         | Excluded | Full text unavailable |  |

|                                                                                                                                                                                                                                |                     |      |                            |          |                       |
|--------------------------------------------------------------------------------------------------------------------------------------------------------------------------------------------------------------------------------|---------------------|------|----------------------------|----------|-----------------------|
| Prevalence, predictors and outcomes of bleeding events in patients with COVID-19 infection on anticoagulation: Retrospective cohort study.                                                                                     | Alkhamis, Ahmed     | 2021 | 10.1016/j.amsu.2021.102567 | Excluded | Observational study   |
| Preventing Thrombohemorrhagic Complications of Heparinized COVID-19 Patients Using Adjunctive Thromboelastography: A Retrospective Study.                                                                                      | Bunch, Connor M     | 2021 | 10.3390/jcm10143097        | Excluded | Observational study   |
| Prognostic factors and predictors of outcome in patients with COVID-19 and related pneumonia: a retrospective cohort study.                                                                                                    | Boari, Gianluca E M | 2020 | 10.1042/BSR20203455        | Excluded | Observational study   |
| Prophylactic or therapeutic doses of heparins for COVID-19 infection? A retrospective study.                                                                                                                                   | Bolzetta, Francesco | 2021 | 10.1007/s40520-020-01750-6 | Excluded | Observational study   |
| Prophylactic versus therapeutic anticoagulation for survival of patients with COVID-19 on steroid.                                                                                                                             | Kuno, Toshiki       | 2021 | 10.1007/s11239-021-02569-2 | Excluded | Observational study   |
| Pulmonary embolism in patients with severe COVID-19 treated with intermediate-to full-dose enoxaparin: A retrospective study.                                                                                                  | Scarduelli, Cleante | 2021 | 10.4081/monaldi.2021.1758  | Excluded | Observational study   |
| Risk Factors for Mortality from COVID-19 in a New York Inner city Epicenter                                                                                                                                                    | Majzoub, M          | 2021 | 10.1016/j.jaci.2020.12.295 | Excluded | Observational study   |
| Risk factors for systemic and venous thromboembolism, mortality and bleeding risks in 1125 patients with COVID-19: relationship with anticoagulation status.                                                                   | Li, Wencheng        | 2021 | 10.18632/aging.202769      | Excluded | Observational study   |
| Real world use of anticoagulation among hospitalized patients with COVID-19 in the United States                                                                                                                               | Bates, B            | 2021 | 10.1002/pds.5305           | Excluded | Observational study   |
| Real-time collection of data on patients with COVID-19 and thrombosis and/or haemorrhage has aided the development of thromboembolism prophylaxis guidelines at the Royal Surrey County Hospital during the COVID-19 pandemic. | Simpson G.          | 2021 | 10.7861/clinmed.21-2-s51   | Excluded | Observational study   |
| Reduction of venous thromboembolic events in hospitalized patients with coronavirus disease 2019 after intensification of thromboprophylaxis                                                                                   | Filippidis          | 2020 | 10.1002/rth2.12413         | Excluded | Full text unavailable |

|                                                                                                                                                                                                  |                     |      |                                                              |          |                       |
|--------------------------------------------------------------------------------------------------------------------------------------------------------------------------------------------------|---------------------|------|--------------------------------------------------------------|----------|-----------------------|
| ROLE OF THROMBODYNAMICS<br>GLOBAL COAGULATION TEST IN IMPROVING TREATMENT RESULTS IN PATIENTS WITH CORONAVIRUS INFECTION AT A COVID-19 HOSPITAL.                                                 | Krylov A.           | 2021 |                                                              | Excluded | Full text unavailable |
| Safety and efficacy of anticoagulation in critically ill patients with COVID-19                                                                                                                  | Shuler, E           | 2021 | 10.1164/ajrccm-conference.2021.203.1_Meeting-Abstracts.A2647 | Excluded | Full text unavailable |
| Safety profile of enhanced thromboprophylaxis strategies for critically ill COVID-19 patients during the first wave of the pandemic: observational report from 28 European intensive care units. | Lavinio, Andrea     | 2021 | 10.1186/s13054-021-03543-3                                   | Excluded | Observational study   |
| Standard prophylactic versus intermediate dose enoxaparin in adults with severe COVID-19: A multi-center, open-label, randomized controlled trial.                                               | Perepu Usha S       | 2021 | 10.1111/jth.15450                                            | Included |                       |
| STANDARD VS HIGH-INTENSITY PROPHYLACTIC ANTICOAGULATION IN COVID-19: A US, CALIFORNIAN RETROSPECTIVE STUDY                                                                                       | Almadi T            |      | 10.1016/j.chest.2021.07.1305                                 | Excluded | Full text unavailable |
| The effect of anticoagulation on clinical outcomes in novel Coronavirus (COVID-19) pneumonia in a U.S. cohort.                                                                                   | Lynn, Lei           | 2021 | 10.1016/j.throm-res.2020.10.031                              | Excluded | Observational study   |
| The effect of anticoagulation on mortality in COVID-19 patients: The drug, the dose, and the D-Dimer                                                                                             | Bilett H            | 2020 | 10.1002/rth2.12413                                           | Excluded | Full text unavailable |
| The hazard of (sub)therapeutic doses of anticoagulants in non-critically ill patients with Covid-19: The Padua province experience.                                                              | Pesavento, Raffaele | 2020 | 10.1111/jth.15022                                            | Excluded | Observational study   |
| The Impact of Different Prophylactic Anticoagulation Doses on the Outcomes of Patients with COVID-19                                                                                             | Rodolfo             | 2021 | 10.1016/j.throm-res.2021.02.031                              | Excluded | Observational study   |
| The impact of protocol-based high-intensity pharmacological thromboprophylaxis on thrombotic events in critically ill COVID-19 patients.                                                         | Atallah, B          | 2021 | 10.1111/anae.15300                                           | Excluded | Observational study   |
| The Impact of Risk-Adjusted Heparin Regimens on the Outcome of Patients with                                                                                                                     | Di Micco, Pierpaolo | 2021 | 10.3390/v13091720                                            | Excluded | Observational study   |

|                                                                                                                                                                                                        |                               |      |                                      |          |                       |  |
|--------------------------------------------------------------------------------------------------------------------------------------------------------------------------------------------------------|-------------------------------|------|--------------------------------------|----------|-----------------------|--|
| COVID-19 Infection. A Prospective Cohort Study.                                                                                                                                                        |                               |      |                                      |          |                       |  |
| The original and modified Caprini score equally predicts venous thromboembolism in COVID-19 patients.                                                                                                  | Tsaplin, S                    | 2021 | 10.1016/j.jvs.2021.02.018            | Excluded | Observational study   |  |
| The Potential Role of Therapeutic Dose of Low Molecular Weight Heparin (LWMH) to Attenuate Hyper-Inflammatory State in Hospitalized COVID-19 Patients                                                  | Mughal M S                    | 2020 | 10.1182/blood-2020-142109            | Excluded | Full text unavailable |  |
| The role of anticoagulation therapy in management of COVID-19 patients                                                                                                                                 | Shahid S                      | 2021 | 10.1136/thorax-2020-BTSabstracts.104 | Excluded | Full text unavailable |  |
| The role of D-dimer for optimal thromboprophylaxis strategy in patients with COVID-19                                                                                                                  | Bhoopat L                     | 2020 | 10.1182/blood-2020-141732            | Excluded | Observational study   |  |
| Therapeutic Anticoagulation Delays Death in COVID-19 Patients: Cross-Sectional Analysis of a Prospective Cohort.                                                                                       | Ionescu, Filip                | 2020 | 10.1055/s-0040-1716721               | Excluded | Observational study   |  |
| Therapeutic Anticoagulation with Heparin in Critically Ill Patients with Covid-19.                                                                                                                     | Goligher, Ewan C              | 2021 | 10.1056/NEJMoa2103417                | Included |                       |  |
| Therapeutic Anticoagulation with Heparin in Noncritically Ill Patients with Covid-19.                                                                                                                  | Lawler, Patrick R             | 2021 | 10.1056/NEJMoa2105911                | Included |                       |  |
| Therapeutic dosing of low-molecular-weight heparin may decrease mortality in patients with severe COVID-19 infection.                                                                                  | Canoglu Kadir                 | 2020 | 10.5144/0256-4947.2020.462           | Excluded | Observational study   |  |
| Therapeutic versus prophylactic anticoagulation for patients admitted to hospital with COVID-19 and elevated D-dimer concentration (ACTION): an open-label, multicentre, randomised, controlled trial. | Lopes, Renato D               | 2021 | 10.1016/S0140-6736(21)01203-4        | Included |                       |  |
| Therapeutic versus prophylactic anticoagulation for severe COVID-19: A randomized phase II clinical trial (HESACOVID).                                                                                 | Lemos, Anna Cristina Bertoldi | 2020 | 10.1016/j.throm-res.2020.09.026      | Included |                       |  |
| Therapeutic vs. prophylactic bemiparin in hospitalized patients with non-severe COVID-19 (BEMICOP): an open-label, multicenter, randomized trial.                                                      | Marcos, María                 | 2021 | 10.1055/a-1667-7534                  | Included |                       |  |
| Thrombo-embolic events associated with Covid-19 ARDS - Epidemiology and risk factors                                                                                                                   | De Montmollin, E              | 2020 | 10.1186/s40635-020-00354-8           | Excluded | Full text unavailable |  |
| Thromboinflammatory state and venous thromboembolic events in patients with                                                                                                                            |                               | 2021 | 10.20452/pamw.15625                  | Excluded | Observational study   |  |

|                                                                                                                                                                             |                         |      |                                                                                             |          |                       |
|-----------------------------------------------------------------------------------------------------------------------------------------------------------------------------|-------------------------|------|---------------------------------------------------------------------------------------------|----------|-----------------------|
| coronavirus disease 2019 admitted to a nonintensive care unit: A prospective study                                                                                          |                         |      |                                                                                             |          |                       |
| Thromboprophylaxis in Critically Ill Coronavirus Disease 2019 Patients.                                                                                                     | Piagnerelli, Michaël    | 2020 | 10.1097/CCE.00000000000000177                                                               | Excluded | Observational study   |
| Thromboprophylaxis and the D-Dimer in critically unwell patients with Covid-19. A UK single centre experience                                                               | Tsiamita, O             | 2021 | 10.1111/bjh.17492                                                                           | Excluded | Full text unavailable |
| Thromboses and COVID-19: reducing inflammation in addition to thromboprophylaxis.                                                                                           | Mehta, Puja             | 2021 | 10.1016/S2665-9913(21)00003-5                                                               | Excluded | Observational study   |
| Thrombosis and anticoagulation in COVID-19.                                                                                                                                 | Ramos, Roberta Pulcheri | 2020 | 10.36416/1806-3756/e20200317                                                                | Excluded | Observational study   |
| Thrombotic complications and anticoagulation in COVID-19 pneumonia: a New York City hospital experience.                                                                    | Hanif, Ahmad            | 2021 | 10.1007/s00277-020-04216-x                                                                  | Excluded | Observational study   |
| Thrombotic Complications in a Canadian Population of Critically Ill Patients with COVID-19                                                                                  | Camille, S              | 2020 | 10.1182/blood-2020-141996                                                                   | Excluded | Observational study   |
| Trends in Venous Thromboembolism Anticoagulation in Patients Hospitalized With COVID-19.                                                                                    | Vaughn, Valerie M       | 2021 | 10.1001/jamanetworkopen.2021.11788                                                          | Excluded | Observational study   |
| Utility of D-dimers and intermediate-dose prophylaxis for venous thromboembolism in critically ill patients with COVID-19.                                                  | Zermatten, Maxime G     | 2020 | 10.1016/j.throm-res.2020.08.027                                                             | Excluded | Observational study   |
| Venous and arterial thromboembolic complications in COVID-19 patients admitted to an academic hospital in Milan, Italy.                                                     | Lodigiani, Corrado      | 2020 | 10.1016/j.throm-res.2020.04.024                                                             | Excluded | Observational study   |
| Venous Thrombo-Embolicism in Hospitalized SARS-CoV-2 Patients Treated with Three Different Anticoagulation Protocols: Prospective Observational Study.                      | Longhitano, Yaroslava   | 2020 | <a href="https://doi.org/10.3390/biology9100310">https://doi.org/10.3390/biology9100310</a> | Excluded | Observational study   |
| Venous thromboembolism and bleeding in critically ill COVID-19 patients treated with higher than standard low molecular weight heparin doses and aspirin: A call to action. | Pavoni, Vittorio        | 2020 | 10.1016/j.throm-res.2020.09.013                                                             | Excluded | Observational study   |
| VTE PROPHYLAXIS STRATEGIES WITH ENOXAPARIN DURING THE COVID-19 PANDEMIC                                                                                                     | Nguyen, Huan Mark       | 2021 | 10.1016/j.chest.2021.07.1299                                                                | Excluded | Full text unavailable |



**Excluded articles during full text selection (search on 23rd May 2022)**

| <b>Title</b>                                                                                                                                                                                                                        | <b>Author</b>       | <b>Year</b> | <b>DOI</b>                                                                              | <b>Eligibility</b> | <b>Reason for exclusion</b>         |
|-------------------------------------------------------------------------------------------------------------------------------------------------------------------------------------------------------------------------------------|---------------------|-------------|-----------------------------------------------------------------------------------------|--------------------|-------------------------------------|
| Comparison of the Effect of Unfractionated Heparin and Enoxaparin Sodium at Different Doses on the Course of COVID-19-Associated Coagulopathy                                                                                       | Olyinyk, Oleksandr  | 2021        | <a href="https://doi.org/10.3390/life11101032">https://doi.org/10.3390/life11101032</a> | Included           |                                     |
| Effect of Antithrombotic Therapy on Clinical Outcomes in Outpatients With Clinically Stable Symptomatic COVID-19: The ACTIV-4B Randomized Clinical Trial.                                                                           | Connors, Jean M     | 2021        | 10.1001/jama.2021.17272                                                                 | Included           | Already included in previous search |
| Efficacy and safety of fondaparinux versus unfractionated heparin in patients hospitalised with severe COVID-19 pneumonia and coagulopathy: a randomised, open-label clinical trial                                                 | Adrian, L H         | 2022        | 10.1093/eurheartj/ehab849.169                                                           | Excluded           | Full text unavailable               |
| Effectiveness of therapeutic heparin versus prophylactic heparin on death, mechanical ventilation, or intensive care unit admission in moderately ill patients with covid-19 admitted to hospital: RAPID randomised clinical trial. | Sholzberg, Michelle | 2021        | 10.1136/bmj.n2400                                                                       | Included           | Already included in previous search |
| Enoxaparin for thromboprophylaxis in hospitalized COVID-19 patients: the X-COVID-19 Randomized Trial                                                                                                                                | Morici, N           | 2022        | 10.1111/eci.13735                                                                       | Included           |                                     |
| High-Dose Prophylactic Anticoagulation in Severe COVID-19 Pneumonia.                                                                                                                                                                | Nadeem, Rashid      | 2021        | 10.1055/a-1485-2372                                                                     | Excluded           | Observational study                 |
| Higher-dose versus standard-dose prophylactic anticoagulation in hospitalized patients with                                                                                                                                         | Long, Brit          | 2022        | 10.1111/acem.14417                                                                      | Excluded           | Review                              |

|                                                                                                                                                                                          |                    |      |                                |          |                                     |
|------------------------------------------------------------------------------------------------------------------------------------------------------------------------------------------|--------------------|------|--------------------------------|----------|-------------------------------------|
| COVID-19.                                                                                                                                                                                |                    |      |                                |          |                                     |
| Intermediate-Dose versus Standard-Dose Prophylactic Anticoagulation in Patients with COVID-19 Admitted to the Intensive Care Unit: 90-Day Results from the INSPIRATION Randomized Trial. | Bikdeli, Behnood   | 2021 | 10.1055/a-1485-2372            | Included | Already included in previous search |
| Optimal Patient Selection for the Prophylactic Anticoagulation Therapy in Patients With Coronavirus Disease 2019.                                                                        | Nishioka, Ayane    | 2021 | 10.1097/CCM.00000000000005158  | Excluded | Commentary                          |
| Optimal thromboprophylaxis strategies in non-critically ill patients with COVID-19 pneumonia. The PROTHROMCOVID Randomized Controlled Trial                                              | Muñoz-Rivas, Nuria | 2022 | 10.1101/2022.05.03.22274594    | Included |                                     |
| Oral Rivaroxaban in the Prophylaxis of COVID-19 Induced Coagulopathy.                                                                                                                    | Kumar, Dhiraj      | 2022 | PMID: 35436816                 | Excluded | Full text unavailable               |
| Oral rivaroxaban versus subcutaneous enoxaparin in the prophylaxis of covid-19 induced coagulopathy in mild to moderate sars cov-2 infection                                             | Km, V              | 2021 | 10.1161/circ.144.suppl-1.10011 | Excluded | Full text unavailable               |
| Standard prophylactic versus intermediate dose enoxaparin in adults with severe COVID-19: A multi-center, open-label, randomized controlled                                              | Perepu, Usha       | 2021 | 10.1111/jth.15450              | Included | Already included in previous search |

|                                                                                                                                                                                                        |                   |      |                                                                                                             |          |                                     |
|--------------------------------------------------------------------------------------------------------------------------------------------------------------------------------------------------------|-------------------|------|-------------------------------------------------------------------------------------------------------------|----------|-------------------------------------|
| trial.                                                                                                                                                                                                 |                   |      |                                                                                                             |          |                                     |
| The role of heparin in reducing in-hospital complications and three-month mortality rates in hospitalized COVID-19 patients.                                                                           | Calabretta, F     | 2022 | 10.1016/j.ejim.2022.03.015                                                                                  | Excluded | Observational study                 |
| Therapeutic anticoagulation in COVID-19 patients.                                                                                                                                                      | Belfaqeeh, O      | 2021 | 10.1016/j.thromres.2021.02.006                                                                              | Excluded | Commentary                          |
| Therapeutic Anticoagulation with Heparin in Critically Ill Patients with Covid-19.                                                                                                                     | Goligher, Ewan C  | 2021 | 10.1056/NEJMoa2103417                                                                                       | Included | Already included in previous search |
| Therapeutic Anticoagulation with Heparin in Noncritically Ill Patients with Covid-19.                                                                                                                  | Lawler, Patrick R | 2021 | 10.1056/NEJMoa2105911                                                                                       | Included | Already included in previous search |
| Therapeutic anticoagulation to prevent thrombosis, coagulopathy, and mortality in severe COVID-19: The Swiss COVID-HEP randomized clinical trial.                                                      | Blondon, Marc     | 2022 | 10.1002/rth2.12712                                                                                          | Included |                                     |
| Therapeutic versus prophylactic anticoagulation for patients admitted to hospital with COVID-19 and elevated D-dimer concentration (ACTION): an open-label, multicentre, randomised, controlled trial. | Lopes, Renato D   | 2021 | 10.1016/S0140-6736(21)01203-4                                                                               | Included | Already included in previous search |
| Therapeutic versus Prophylactic Bemiparin in Hospitalized Patients with Nonsevere COVID-19 Pneumonia (BEMICOP Study): An Open-Label, Multicenter, Randomized, Controlled Trial                         | Marcos-Jubilar, M | 2022 | 10.1055/a-1667-7534                                                                                         | Included | Already included in previous search |
| Thrombosis and bleeding in critically ill COVID-19 patients at higher than prophylactic dose of heparins                                                                                               | Mavri, A          | 2021 | 10.1002/rth2.12589                                                                                          | Excluded | Full text unavailable               |
| Tissue plasminogen activator for the treatment of adults with critical COVID-19: A pilot randomized clinical trial                                                                                     | Rashidi, Fahrid   | 2021 | <a href="https://doi.org/10.1016/j.thromres.2021.12.003">https://doi.org/10.1016/j.thromres.2021.12.003</a> | Included |                                     |
